# Supplementary material
Source: HighWire-hosted journal article supplement (http://www.qdcxjkg.com/highwire/filestream/113650/field_highwire_adjunct_files/0/erj01487-2012_online_supplementary_material.pdf)

## ONLINE DEPOSITORY

---

- Figure S1. Flow diagram.
- Table S1. Prespecified causes of exclusion and number of children excluded.
- Table S2. Monthly incidence rates per 1000 and rate ratios of wheezing episodes in asthmatic and non-asthmatic children from 0 to 36 months.
- Table S3. Monthly incidence rates per 1000 and rate ratio of wheeze from 0 to 36 months in children with allergic and non-allergic asthma.
- Table S4. Monthly incidence rates per 1000 of wheezing episodes in asthmatic and non-asthmatic children in the first three years of age, normalized for calendar month.
- Table S5. Joinpoint regression methodology.
- Table S6. Residual plots.
- Table S7. Other regression diagnostics.
- Table S8. Results of the permutation tests for each regression model.
- Figure S2. Mean monthly incidence rates (per 1000) of wheeze from birth to thirty-six months of age in children with allergic and non-allergic asthma.
- Figure S3. Monthly incidence rates of wheeze in children with non-allergic and allergic asthma for calendar month.

Figure S1. Flow diagram

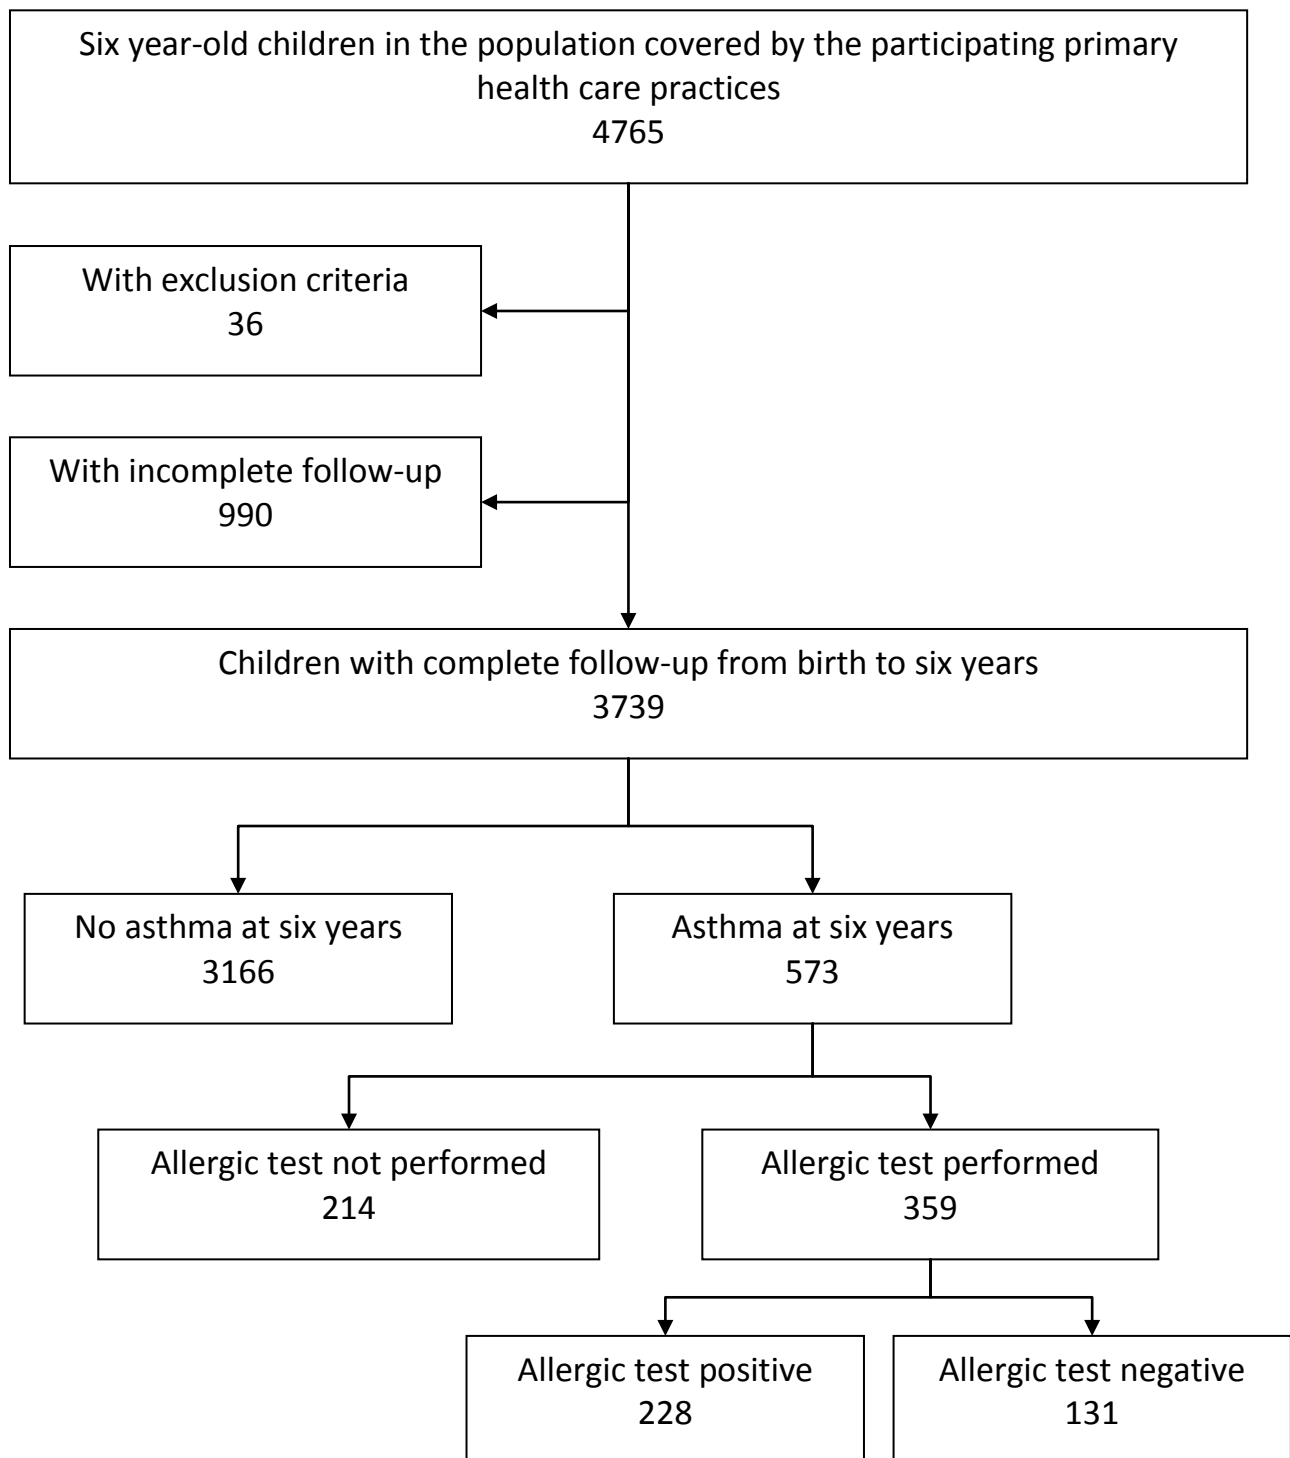

**Table S1. Prespecified causes of exclusion and number of children excluded.**

| <b><i>Causes of exclusion:</i></b>                                                                                                                                                                                                                               | <b>Nº of excluded</b> |
|------------------------------------------------------------------------------------------------------------------------------------------------------------------------------------------------------------------------------------------------------------------|-----------------------|
| Tuberculosis.                                                                                                                                                                                                                                                    | 3                     |
| Bronchopulmonary dysplasia/chronic neonatal lung disease.                                                                                                                                                                                                        | 2                     |
| $\alpha$ -1-antitrypsin deficiency.                                                                                                                                                                                                                              | 1                     |
| Foreign body aspiration.                                                                                                                                                                                                                                         | 1                     |
| Pulmonary congenital anomalies: pulmonary sequestration, vascular rings, bronchial stenosis, cystic adenomatoid malformation, bronchogenic cysts, congenital pulmonary lymphangiectasia, congenital lobar emphysema.                                             | 2                     |
| Congenital heart disease, except mild non-complicated lesions as small patent ductus arteriosus, auricular septal defects and ventricular septal defects.                                                                                                        | 18                    |
| Neuromuscular disorders and cerebral palsy with Gross Motor Function Classification System $\geq$ 4 (children cannot sit on their own).                                                                                                                          | 7                     |
| Chronic aspiration syndrome.                                                                                                                                                                                                                                     | 1                     |
| Interstitial lung diseases as pulmonary alveolar proteinosis, sarcoidosis, surfactant dysfunction disorders, hypersensitivity pneumonitis, eosinophilic pneumonia, neuroendocrine cell hyperplasia of infancy, desquamative interstitial pneumonitis and others. | 1                     |
| <b>Other prespecified exclusion criteria not met for any children:</b>                                                                                                                                                                                           |                       |
| Cystic fibrosis.                                                                                                                                                                                                                                                 |                       |
| Pulmonary hemosiderosis.                                                                                                                                                                                                                                         |                       |
| Sickle cell disease.                                                                                                                                                                                                                                             |                       |
| Bronchiectasis.                                                                                                                                                                                                                                                  |                       |
| Bronchiolitis obliterans, bronchitis follicular.                                                                                                                                                                                                                 |                       |
| Primary ciliary dyskinesia/Kartagener syndrome.                                                                                                                                                                                                                  |                       |
| Immunodeficiency, except selective IgA deficiency and IgG subclass deficiencies.                                                                                                                                                                                 |                       |
| Severe thoracic deformities.                                                                                                                                                                                                                                     |                       |
| Primary or metastatic lung neoplasms.                                                                                                                                                                                                                            |                       |

**Table S2. Monthly incidence rates per 1000 and rate ratio of wheeze in asthmatic and non-asthmatic children from 0 to 36 months.**

| Month<br>(midpoint) | Number of<br>episodes                                |                                                 | Mean monthly incidence rate<br>(per 1000 children) |                       | Rate ratio<br>(95% CI) |
|---------------------|------------------------------------------------------|-------------------------------------------------|----------------------------------------------------|-----------------------|------------------------|
|                     | Non-asthmatic<br>children<br>(n <sub>0</sub> = 3166) | Asthmatic<br>children<br>(n <sub>1</sub> = 573) | Non-asthmatic<br>children                          | Asthmatic<br>children |                        |
| 0.5                 | 10                                                   | 2                                               | 3.16                                               | 3.49                  | 1.11 (0.24 – 5.24)     |
| 1.5                 | 33                                                   | 11                                              | 10.42                                              | 19.20                 | 1.84 (0.93 – 3.64)     |
| 2.5                 | 63                                                   | 21                                              | 19.90                                              | 36.65                 | 1.84 (1.12 – 3.02)     |
| 3.5                 | 83                                                   | 28                                              | 26.22                                              | 48.87                 | 1.86 (1.21 – 2.86)     |
| 4.5                 | 116                                                  | 52                                              | 36.64                                              | 90.75                 | 2.48 (1.79 – 3.44)     |
| 5.5                 | 184                                                  | 50                                              | 58.12                                              | 87.26                 | 1.50 (1.10 – 2.05)     |
| 6.5                 | 157                                                  | 53                                              | 49.59                                              | 92.50                 | 1.87 (1.37 – 2.55)     |
| 7.5                 | 157                                                  | 36                                              | 49.59                                              | 62.83                 | 1.27 (0.88 – 1.82)     |
| 8.5                 | 157                                                  | 52                                              | 49.59                                              | 90.75                 | 1.83 (1.34 – 2.50)     |
| 9.5                 | 130                                                  | 59                                              | 41.06                                              | 102.97                | 2.51 (1.84 – 3.41)     |
| 10.5                | 123                                                  | 38                                              | 38.85                                              | 66.32                 | 1.71 (1.19 – 2.46)     |
| 11.5                | 116                                                  | 42                                              | 36.64                                              | 73.30                 | 2.00 (1.41 – 2.85)     |
| 12.5                | 92                                                   | 32                                              | 29.06                                              | 55.85                 | 1.92 (1.29 – 2.87)     |
| 13.5                | 93                                                   | 42                                              | 29.37                                              | 73.30                 | 2.50 (1.73 – 3.59)     |
| 14.5                | 99                                                   | 53                                              | 31.27                                              | 92.50                 | 2.96 (2.12 – 4.13)     |
| 15.5                | 75                                                   | 44                                              | 23.69                                              | 76.79                 | 3.24 (2.23 – 4.70)     |
| 16.5                | 71                                                   | 25                                              | 22.43                                              | 43.63                 | 1.95 (1.23 – 3.07)     |
| 17.5                | 91                                                   | 38                                              | 28.74                                              | 66.32                 | 2.31 (1.58 – 3.37)     |
| 18.5                | 95                                                   | 35                                              | 30.01                                              | 61.08                 | 2.04 (1.38 – 3.00)     |
| 19.5                | 78                                                   | 28                                              | 24.64                                              | 48.87                 | 1.98 (1.29 – 3.05)     |
| 20.5                | 84                                                   | 48                                              | 26.53                                              | 83.77                 | 3.16 (2.21 – 4.50)     |
| 21.5                | 86                                                   | 54                                              | 27.16                                              | 94.24                 | 3.47 (2.47 – 4.88)     |
| 22.5                | 63                                                   | 41                                              | 19.90                                              | 71.55                 | 3.60 (2.43 – 5.33)     |
| 23.5                | 86                                                   | 47                                              | 27.16                                              | 82.02                 | 3.02 (2.12 – 4.31)     |
| 24.5                | 82                                                   | 43                                              | 25.90                                              | 75.04                 | 2.90 (2.00 – 4.19)     |
| 25.5                | 68                                                   | 47                                              | 21.48                                              | 82.02                 | 3.82 (2.63 – 5.54)     |
| 26.5                | 80                                                   | 38                                              | 25.27                                              | 66.32                 | 2.62 (1.78 – 3.86)     |
| 27.5                | 61                                                   | 38                                              | 19.27                                              | 66.32                 | 3.44 (2.30 – 5.16)     |
| 28.5                | 61                                                   | 53                                              | 19.27                                              | 92.50                 | 4.80 (3.32 – 6.94)     |
| 29.5                | 96                                                   | 55                                              | 30.32                                              | 95.99                 | 3.17 (2.27 – 4.41)     |
| 30.5                | 65                                                   | 43                                              | 20.53                                              | 75.04                 | 3.66 (2.49 – 5.37)     |
| 31.5                | 54                                                   | 49                                              | 17.06                                              | 85.51                 | 5.01 (3.41 – 7.38)     |
| 32.5                | 46                                                   | 59                                              | 14.53                                              | 102.97                | 7.09 (4.82 – 10.42)    |
| 33.5                | 75                                                   | 44                                              | 23.69                                              | 76.79                 | 3.24 (2.23 – 4.70)     |
| 34.5                | 61                                                   | 51                                              | 19.27                                              | 89.01                 | 4.62 (3.18 – 6.70)     |
| 35.5                | 82                                                   | 52                                              | 25.90                                              | 90.75                 | 3.50 (2.48 – 4.96)     |
| TOTAL               | 3173                                                 | 1503                                            | 27.84                                              | 72.86                 | 2.62 (1.81 – 3.78)     |

**Table S3. Monthly incidence rates per 1000 and rate ratio of wheeze from 0 to 36 months in children with allergic and non-allergic asthma.**

| Month<br>(midpoint) | Number of<br>episodes                  |                                    | Mean monthly incidence rate<br>(per 1000 children) |                 |
|---------------------|----------------------------------------|------------------------------------|----------------------------------------------------|-----------------|
|                     | Non-allergic asthma<br>( $n_0 = 131$ ) | Allergic asthma<br>( $n_1 = 228$ ) | Non-allergic asthma                                | Allergic asthma |
| 0.5                 | 0                                      | 0                                  | 0.00                                               | 0.00            |
| 1.5                 | 5                                      | 1                                  | 38.17                                              | 4.39            |
| 2.5                 | 1                                      | 7                                  | 7.63                                               | 30.70           |
| 3.5                 | 6                                      | 8                                  | 45.80                                              | 35.09           |
| 4.5                 | 20                                     | 13                                 | 152.67                                             | 57.02           |
| 5.5                 | 19                                     | 15                                 | 145.04                                             | 65.79           |
| 6.5                 | 14                                     | 15                                 | 106.87                                             | 65.79           |
| 7.5                 | 8                                      | 16                                 | 61.07                                              | 70.18           |
| 8.5                 | 16                                     | 18                                 | 122.14                                             | 78.95           |
| 9.5                 | 15                                     | 21                                 | 114.50                                             | 92.11           |
| 10.5                | 11                                     | 15                                 | 83.97                                              | 65.79           |
| 11.5                | 14                                     | 18                                 | 106.87                                             | 78.95           |
| 12.5                | 6                                      | 14                                 | 45.80                                              | 61.40           |
| 13.5                | 14                                     | 10                                 | 106.87                                             | 43.86           |
| 14.5                | 21                                     | 15                                 | 160.31                                             | 65.79           |
| 15.5                | 13                                     | 15                                 | 99.24                                              | 65.79           |
| 16.5                | 9                                      | 7                                  | 68.70                                              | 30.70           |
| 17.5                | 9                                      | 10                                 | 68.70                                              | 43.86           |
| 18.5                | 10                                     | 13                                 | 76.34                                              | 57.02           |
| 19.5                | 9                                      | 10                                 | 68.70                                              | 43.86           |
| 20.5                | 13                                     | 22                                 | 99.24                                              | 96.49           |
| 21.5                | 14                                     | 18                                 | 106.87                                             | 78.95           |
| 22.5                | 12                                     | 12                                 | 91.60                                              | 52.63           |
| 23.5                | 13                                     | 22                                 | 99.24                                              | 96.49           |
| 24.5                | 17                                     | 16                                 | 129.77                                             | 70.18           |
| 25.5                | 11                                     | 24                                 | 83.97                                              | 105.26          |
| 26.5                | 13                                     | 12                                 | 99.24                                              | 52.63           |
| 27.5                | 7                                      | 17                                 | 53.44                                              | 74.56           |
| 28.5                | 14                                     | 22                                 | 106.87                                             | 96.49           |
| 29.5                | 12                                     | 25                                 | 91.60                                              | 109.65          |
| 30.5                | 13                                     | 19                                 | 99.24                                              | 83.33           |
| 31.5                | 10                                     | 23                                 | 76.34                                              | 100.88          |
| 32.5                | 12                                     | 33                                 | 91.60                                              | 144.74          |
| 33.5                | 10                                     | 21                                 | 76.34                                              | 92.11           |
| 34.5                | 9                                      | 28                                 | 68.70                                              | 122.81          |
| 35.5                | 7                                      | 23                                 | 53.44                                              | 100.88          |
| TOTAL               | 407                                    | 578                                | 86.30                                              | 70.42           |

**Table S4. Monthly incidence rates per 1000 of wheezing episodes in asthmatic and non-asthmatic children in the first three years of age, for calendar month.**

| Month | Non-asthmatic children |        |        | Asthmatic children |        |        |
|-------|------------------------|--------|--------|--------------------|--------|--------|
|       | Year 1                 | Year 2 | Year 3 | Year 1             | Year 2 | Year 3 |
| Jul   | 9.48                   | 14.21  | 6.95   | 17.45              | 24.43  | 31.41  |
| Aug   | 6.32                   | 6.95   | 6.00   | 10.47              | 20.94  | 45.38  |
| Sep   | 19.27                  | 16.42  | 13.58  | 26.18              | 80.28  | 102.97 |
| Oct   | 26.53                  | 32.53  | 23.06  | 68.06              | 85.51  | 80.28  |
| Nov   | 43.27                  | 27.48  | 38.22  | 76.79              | 76.79  | 102.97 |
| Dec   | 63.49                  | 48.01  | 32.22  | 120.42             | 83.77  | 134.38 |
| Jan   | 64.75                  | 37.59  | 31.59  | 95.99              | 104.71 | 85.51  |
| Feb   | 45.48                  | 28.11  | 18.64  | 76.79              | 62.83  | 95.99  |
| Mar   | 49.91                  | 36.01  | 26.85  | 90.75              | 99.48  | 94.24  |
| Apr   | 37.59                  | 29.06  | 24.32  | 83.77              | 75.04  | 73.30  |
| May   | 33.80                  | 25.58  | 24.01  | 61.08              | 89.01  | 94.24  |
| Jun   | 19.90                  | 18.00  | 17.06  | 47.12              | 47.12  | 57.59  |

**Table S5. Joinpoint regression methodology.**

Joinpoint regression is a least square lineal regression method that allows the building of regression models in which trend changes are permitted, that is, models in which the data are not fitted to a single regression line but a two or more segments joined in one or more joinpoints. The U.S. National Cancer Institute has developed a specific software for these models.

Models can be lineal or log-lineal. We used lineal models for IR but log-lineal for RR because using a non-transformed RR model caused a violation of normality assumption ( $p = 0.001$  in Shapiro-Wilk test). Durbin-Watson tests showed no evidence of autocorrelation in the models and in a graphic analysis of regression residuals there were not gross violations of the basic assumptions of lineality, homoscedasticity and independence (tables E6 and E7), so homoscedasticity was assumed and a model without autocorrelations was fitted.

Models with between zero and five joinpoints were tested. The method for joinpoint search was the “grid search”, which creates a grid of possible joinpoint locations and uses the sum of squared errors (SSE) to identify which one best fit the data. A minimum of three observations from a joinpoint to either end of the data and a minimum of four observations between two joinpoints were required, to avoid the joinpoints to be too much close and to allow each segment had a minimum of observations that would permit the calculation of standard errors.

Selection of the final model was based on a permutation test (results in table E8). Although the software can also use for this purpose the BIC (bayesian information criterion) that allows a faster analysis, permutation test was chosen because it is more parsimonious and lead to a model with less joinpoints. The permutation test compares two models, one with a lower number of joinpoints that is considered the “null hypothesis”, and a second with more joinpoints which is considered the “alternative hypothesis”. The comparison between them is made through a multiple permutation procedure<sup>(1)</sup>, which for each comparison generates a Monte Carlo sample of 4500 randomly permuted data sets. The best fitted model in each comparison is selected according to a specified global significance level ( $p$ ) established in 0.05, with a Bonferroni’s correction for multiple comparisons.

(1) Kim HJ, Fay MP, Feuer EJ, Midthune DN. Permutation tests for joinpoint regression with applications to cancer rates [correction appears in *Stat Med* 2001;**20**:655]. *Stat Med* 2000;**19**:335-351.

Table S6. Residual plots.

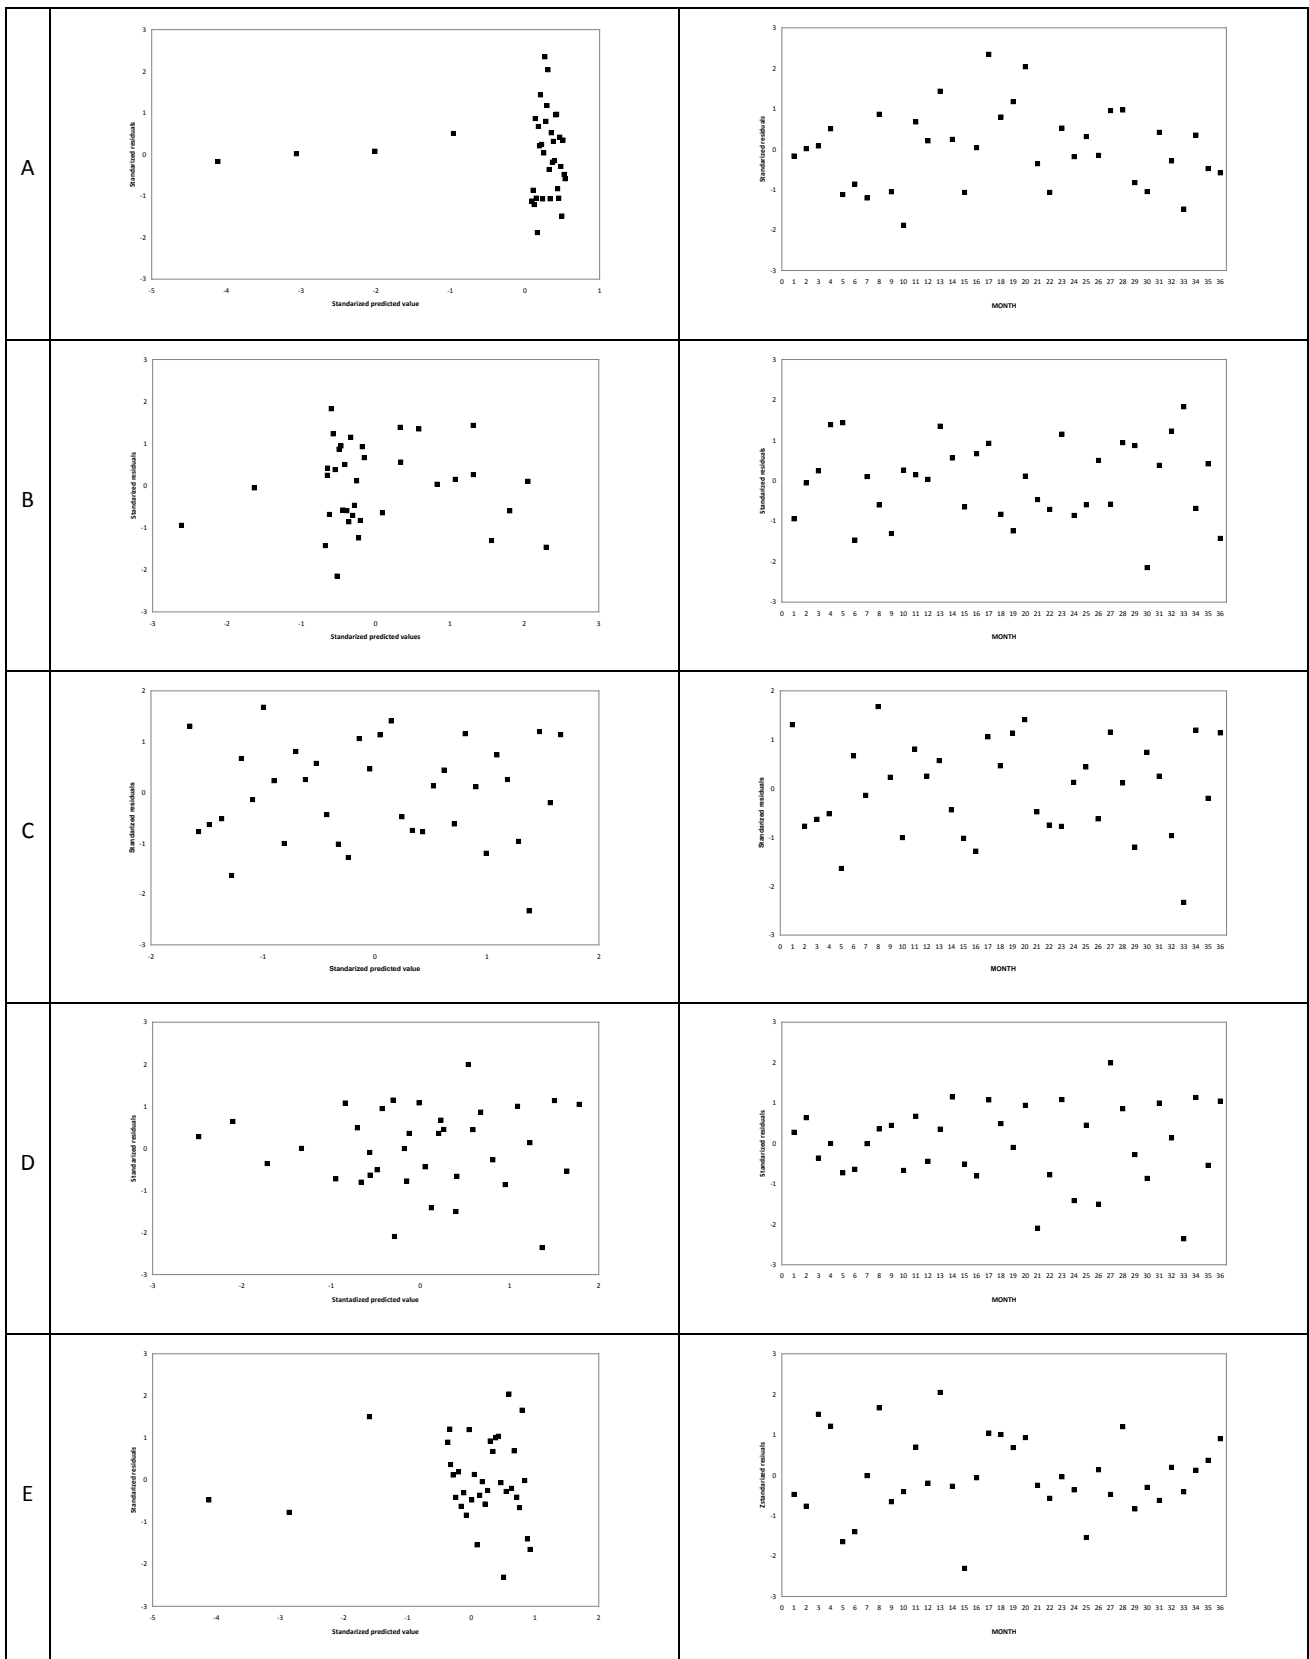

Standardized residuals as a function of standardized predicted value (left) and as a function of age (right). A) IR in asthmatic children; B) IR in non-asthmatic children; C) Log rate-ratio; D) IR in allergic asthma; E) IR in non-allergic asthma.



**Table S7. Other regression diagnostics.**

| Model                                   | R <sup>2</sup> | Durbin-Watson test for autocorrelation* |             | Shapiro-Wilk test of standardized residuals for normality assumption (statistic and significance level)** | Breusch-Pagan test for homoscedasticity assumption (significance level)*** |
|-----------------------------------------|----------------|-----------------------------------------|-------------|-----------------------------------------------------------------------------------------------------------|----------------------------------------------------------------------------|
|                                         |                | d-value                                 | (4-d) value |                                                                                                           |                                                                            |
| IR in non-asthmatic children            | 0.898          | 2.04240                                 | 1.95760     | 0.978 (p = 0.674)                                                                                         | p=0.922                                                                    |
| IR in asthmatic children                | 0.608          | 1.67331                                 | 2.32669     | 0.981 (p = 0.791)                                                                                         | p=0.239                                                                    |
| Rate ratio (log-lineal model)           | 0.691          | 1.97274                                 | 2.02726     | 0.930 (p = 0.170)                                                                                         | p=0.596                                                                    |
| IR in children with allergic asthma     | 0.742          | 2.63622                                 | 1.36378     | 0.970 (p = 0.419)                                                                                         | p=0.106                                                                    |
| IR in children with non-allergic asthma | 0.461          | 1.88224                                 | 2.11776     | 0.980 (p = 0.746)                                                                                         | p=0.371                                                                    |

\*For a model with intercept, only one predictive variable and 36 point cases, autocorrelation (positive or negative) can be excluded at a significance level of 0.1 if both d-value and (4-d) value are  $> 1.31499^{(2)}$ .

\*\* If  $p > 0.05$ , a normal distribution of residuals can be assumed.

\*\*\* If  $p > 0.05$ , homoscedasticity of residuals can be assumed.

(2) Savin NE, White KJ. The Durbin-Watson test for serial correlation with extreme sample sizes or many regressors. *Econometrica* 1977;**45**:1989-96

**Table S8. Results of the permutation tests for each regression model.**

| Model                                   | Test Number | Null Hypothesis  | Alternate Hypothesis | P-Value   | Significance Level |
|-----------------------------------------|-------------|------------------|----------------------|-----------|--------------------|
| IR in asthmatic children                | #1          | 0 Joinpoint(s)   | 5 Joinpoint(s) *     | 0.0004444 | 0.0100000          |
|                                         | #2          | 1 Joinpoint(s) * | 5 Joinpoint(s)       | 0.2375556 | 0.0125000          |
|                                         | #3          | 1 Joinpoint(s) * | 4 Joinpoint(s)       | 0.1691111 | 0.0125000          |
|                                         | #4          | 1 Joinpoint(s) * | 3 Joinpoint(s)       | 0.0908889 | 0.0125000          |
|                                         | #5          | 1 Joinpoint(s) * | 2 Joinpoint(s)       | 0.0224444 | 0.0125000          |
| IR in non-asthmatic children            | #1          | 0 Joinpoint(s)   | 5 Joinpoint(s) *     | 0.0002222 | 0.0100000          |
|                                         | #2          | 1 Joinpoint(s)   | 5 Joinpoint(s) *     | 0.0002222 | 0.0125000          |
|                                         | #3          | 2 Joinpoint(s) * | 5 Joinpoint(s)       | 0.2857778 | 0.0166667          |
|                                         | #4          | 2 Joinpoint(s) * | 4 Joinpoint(s)       | 0.3466667 | 0.0166667          |
|                                         | #5          | 2 Joinpoint(s) * | 3 Joinpoint(s)       | 0.3911111 | 0.0166667          |
| IR in children with allergic asthma     | #1          | 0 Joinpoint(s) * | 5 Joinpoint(s)       | 0.0111111 | 0.0100000          |
|                                         | #2          | 0 Joinpoint(s)   | 4 Joinpoint(s) *     | 0.0077778 | 0.0100000          |
|                                         | #3          | 1 Joinpoint(s) * | 4 Joinpoint(s)       | 0.0266667 | 0.0125000          |
|                                         | #4          | 1 Joinpoint(s)   | 3 Joinpoint(s) *     | 0.0100000 | 0.0125000          |
|                                         | #5          | 2 Joinpoint(s) * | 3 Joinpoint(s)       | 0.7937778 | 0.0166667          |
| IR in children with non-allergic asthma | #1          | 0 Joinpoint(s)   | 5 Joinpoint(s) *     | 0.0073333 | 0.0100000          |
|                                         | #2          | 1 Joinpoint(s) * | 5 Joinpoint(s)       | 0.6031111 | 0.0125000          |
|                                         | #3          | 1 Joinpoint(s) * | 4 Joinpoint(s)       | 0.8584444 | 0.0125000          |
|                                         | #4          | 1 Joinpoint(s) * | 3 Joinpoint(s)       | 0.8353333 | 0.0125000          |
|                                         | #5          | 1 Joinpoint(s) * | 2 Joinpoint(s)       | 0.7655556 | 0.0125000          |
| Log RR                                  | #1          | 0 Joinpoint(s) * | 5 Joinpoint(s)       | 0.5368889 | 0.0100000          |
|                                         | #2          | 0 Joinpoint(s) * | 4 Joinpoint(s)       | 0.5913333 | 0.0100000          |
|                                         | #3          | 0 Joinpoint(s) * | 3 Joinpoint(s)       | 0.6520000 | 0.0100000          |
|                                         | #4          | 0 Joinpoint(s) * | 2 Joinpoint(s)       | 0.5184444 | 0.0100000          |
|                                         | #5          | 0 Joinpoint(s) * | 1 Joinpoint(s)       | 0.6131111 | 0.0100000          |

\* Selected model

Figure S2. Mean monthly incidence rates (per 1000) of wheeze from birth to thirty-six months of age in children with allergic (*closed squares*) and non-allergic (*open circles*) asthma.

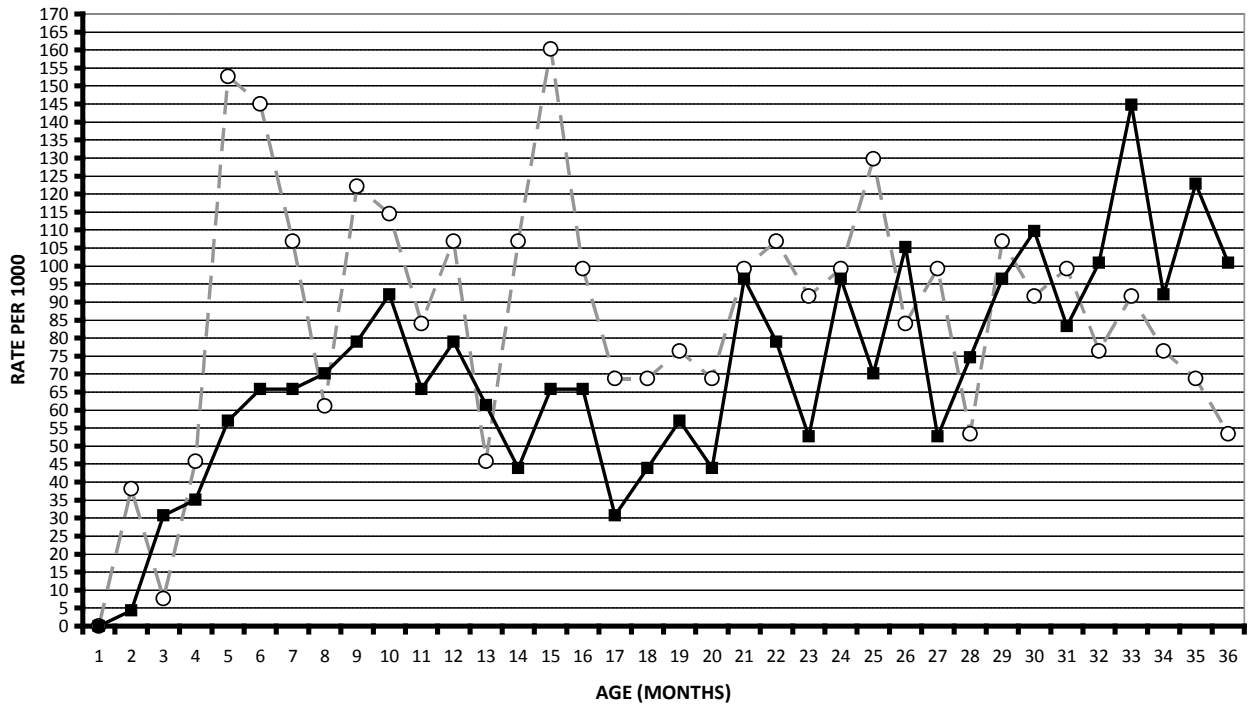

Figure S3. Monthly incidence rates of wheeze in children with non-allergic (left) and allergic (right) asthma, normalized for calendar month, in the first (*closed squares*), second (*open squares*) and third (*closed triangles*) years of age.

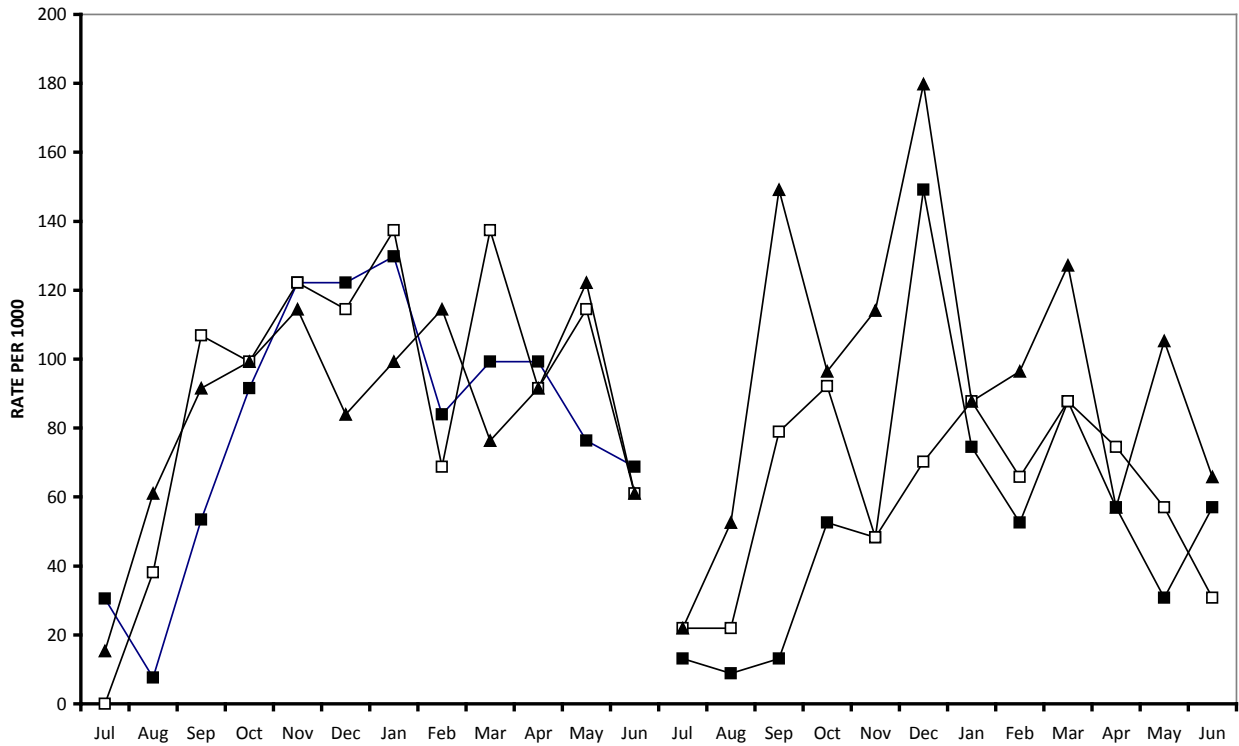

Supplement: erj01487-2012_online_supplementary_material.pdf [file erj01487-2012_online_supplementary_material.pdf]
